# Supplementary material for: Pregestational Prediabetes Induces Maternal Hypothalamic–Pituitary–Adrenal (HPA) Axis Dysregulation and Results in Adverse Foetal Outcomes
Source: MDPI journal article supplement (doi:10.3390/ijms25105431), 2024-05-16
Supplement: s1 [file s1]

### 3.10 Pups Systolic Blood Pressure

The systolic blood pressure of pups born from the non-prediabetic (NDP) female group (n=6 per group) and pups born from the prediabetic (PD) female group (n=6 per group) at week 3, 6 and 16.

The systolic blood pressure in the pups born from the PD group was significantly higher when compared to pups born from the NDP group in all the experimental weeks.

Table S1: Systolic Blood Pressure in the pups born from the non-pre-diabetic (NDP) female and pre-diabetic (PD) female group (n = 6, per group) at week 3, 6 and 16.

| Groups (n=6) |     | Systolic pressure (mmHg) |
|--------------|-----|--------------------------|
| Week 3       | NDP | 119.5 ± 0.2305           |
|              | PD  | 122.2 ± 0.2072 ***       |
| Week 6       | NDP | 119.7 ± 0.2029           |
|              | PD  | 122.4 ± 0.2633***        |
| Week 16      | NDP | 120.6 ± 0.3646           |
|              | PD  | 128.7 ± 1.302 ***        |

Values are expressed as mean ± SEM. \*\*\* $p < 0.001$  denotes comparison with NDP.
